# Supplementary material for: Vulnerability to pine sawfly damage decreases with site fertility but the opposite is true with Scleroderris canker damage; results from Finnish ICP Forests and NFI data
Source: Springer Nature journal article supplement (doi:10.1007/s13595-014-0435-8), 2014-11-21
Supplement: MOESM2 [file 13595_2014_435_MOESM2_ESM.pdf]

Supplementary Table S2. The probability of pine sawfly outbreak continuing (ICP Forests Level 1 plots). Values shown are posterior means and 95% probability intervals for the inverse logit transformation of the parameter  $\beta$  (site type,1) of the HB model (see Supplementary Table S1)

| Site type | The probability of pine sawfly outbreak continuing | 95% probability interval |
|-----------|----------------------------------------------------|--------------------------|
| A         | 0.41                                               | 0.12-0.77                |
| B         | 0.61                                               | 0.48-0.74                |
| C         | 0.58                                               | 0.49-0.67                |
| D         | 0.53                                               | 0.07-0.97                |
| E         | 0.4                                                | 0.18-0.66                |
